# Supplementary material for: Current water quality guidelines across North America and Europe do not protect lakes from salinization
Source: PubMed Central journal article supplement — Proc Natl Acad Sci U S A. 2022 Feb 22;119(9):e2115033119. doi: 10.1073/pnas.2115033119 (PMC8892338; doi:10.1073/pnas.2115033119), 2022-02-22
Supplement: pnas.2115033119.sapp.pdf [file pnas.2115033119.sapp.pdf]

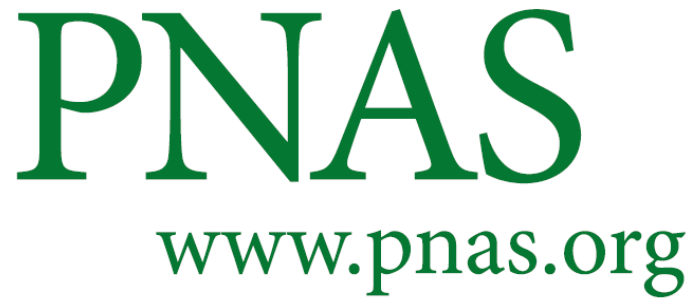

**Supplementary Information for**

**Current water quality guidelines across North America and Europe do not protect lakes from salinization**

William D. Hintz\*, Shelley E. Arnott, Celia C. Symons, Danielle A. Greco, Alexandra McClymont, Jennifer A. Brentrup, Miguel Cañedo-Argüelles, Alison M. Derry, Amy L. Downing, Derek K. Gray, Stephanie J. Melles, Rick A. Relyea, James A. Rusak, Catherine L. Searle, Louis Astorg, Henry K. Baker, Beatrix E. Beisner, Kathryn L. Cottingham, Zeynep Ersoy, Carmen Espinosa, Jaclyn Franceschini, Angelina T. Giorgio, Norman Göbeler, Emily Hassal, Marie-Pier Hébert, Mercedes Huynh, Samuel Hylander, Kacie L. Jonasen, Andrea E. Kirkwood, Silke Langenheder, Ola Langvall, Hjalmar Laudon, Lovisa Lind, Maria Lundgren, Lorenzo Proia, Matthew S. Schuler, Jonathan B. Shurin, Christopher F. Steiner, Maren Striebel, Simon Thibodeau, Pablo Urrutia-Cordero, Lidia Vendrell-Puigmitja, Gesa A. Weyhenmeyer

\*Corresponding author: William D. Hintz.  
**Email:** [William.Hintz@utoledo.edu](mailto:William.Hintz@utoledo.edu) or [hintzwd@gmail.com](mailto:hintzwd@gmail.com)

**Data Availability:** Data, supporting files, and metadata can also be found in the Scholars Portal Dataverse archive at: <https://doi.org/10.5683/SP3/BIDMCI> (Arnott et al. 2021)

**This PDF file includes:**

Appendix 1 ..... 2  
Appendix 2 ..... 5  
Appendix 3 ..... 6  
Appendix 4 ..... 12  
Appendix 5 ..... 28  
Appendix 6 ..... 32

## APPENDIX 1

### **Supplemental Methods Text**

For each experiment, we filled the mesocosms, which ranged in size from 80 to 2500 L, with water that was filtered through a 40- to 100- $\mu\text{m}$  mesh to remove most zooplankton but allow small, edible phytoplankton to pass through. The water source was a local lake for 13 of the experiments; in the remaining cases, we used water from a lake outflow (Convict) or well water (Purdue, Dartmouth). We measured total phosphorus (TP), total nitrogen (TN), calcium ( $\text{Ca}^{2+}$ ),  $\text{Cl}^-$ , and conductivity by either a) taking a water sample from the lake, b) using a composite sample from multiple mesocosms at the beginning of the experiment, or c) by using existing data from prior analyses from long-term monitoring programs (see SI Appendix 1, Table 1.1 for water conditions for each study site). After allowing the phytoplankton communities to acclimate for a few days, we collected zooplankton from the same lake where water was collected or a nearby pond when well water was used, using the same mesh size used to filter the mesocosm water. An aliquot of zooplankton was added to each mesocosm to recreate the same community composition and abundance as in the source lake or pond. To prevent declines in zooplankton abundance due to food limitation in the mesocosms, we added nitrogen ( $\text{NH}_4\text{NO}_3$ ) and phosphorus ( $\text{KH}_2\text{PO}_4$ ) to 13 of the experimental sites at weeks 2 and 4 to replace nutrients, assuming an estimated loss of 5% per day from the water column due to periphyton growth and sedimentation (1).

One to nine days after we stocked the zooplankton, we added NaCl to achieve the nominal experimental concentrations (SI Appendix 2, Table 2.1). Initial day (day 1) and final (day 41 – 51)  $\text{Cl}^-$  concentrations were determined either by measuring  $\text{Cl}^-$  directly or estimating  $\text{Cl}^-$  indirectly using conductivity (SI Appendix 3, Tables 3.1). Nominal and actual  $\text{Cl}^-$  concentrations differed by 5-28% (SI Appendix 3, Tables 3.2). Chloride concentrations sometimes varied over time due to rainfall and evaporation in the mesocosms, therefore we used the average  $\text{Cl}^-$  values between initial and final samples for all statistical analyses (SI Appendix 3, Figs. 3.1 – 3.2). We also measured several abiotic variables during the experiment including water temperature, conductivity, pH, and dissolved oxygen.

### **References**

1. A. L. Downing *et al.*, Environmental fluctuations induce scale-dependent compensation and increase stability in plankton ecosystems. *Ecology* 89:3204-3214 (2008).

**Table 1.1.** Location and characteristics of source lakes and experimental approach. Latitude (Lat) and Longitude (Long) are given in decimal degrees, mesocosm volume (Vol), n is the number of mesocosms used in the experiment, Start and End are the dates in 2018 when the experiments were conducted, chloride (Cl), calcium (Ca), total nitrogen (TN), total phosphorus (TP), and chlorophyll a (Chl a) concentration represent source water values.

| Lake      | Country | Lat   | Long    | Venue | Vol (L) | n  | Start (DD-MM) | End (DD-MM) | Duration (days) | Cl (mg/L) | Ca (mg/L) | TN (ug/L) | TP (ug/L) | Chl a (ug/L) | pH  |
|-----------|---------|-------|---------|-------|---------|----|---------------|-------------|-----------------|-----------|-----------|-----------|-----------|--------------|-----|
| Paint     | Canada  | 45.22 | -78.94  | land  | 800     | 30 | 28-06         | 08-09       | 42              | 17.5      | 4.7       | 210       | 8.4       | 0.58         | 7.0 |
| Long      | Canada  | 44.53 | -76.39  | lake  | 1570    | 30 | 22-06         | 02-08       | 49              | 0.41      | 34.7      | 330       | 13.6      | 0.34         | 8.1 |
| Dartmouth | USA     | 43.73 | -72.25  | land  | 120     | 21 | 25-07         | 06-09       | 43              | 9.7       | 19.7      | 187       | 7         | 1.81         | 7.6 |
| Sturgeon  | Canada  | 44.46 | -78.67  | land  | 200     | 30 | 30-06         | 11-08       | 43              | 14.8      | 26.2      | 540       | 9.2       | 3.76         | 8.1 |
| Purdue    | USA     | 40.45 | -87.05  | land  | 150     | 30 | 13-09         | 31-10       | 42              | 1.62      | 59.2      | 570       | 66.8      | 2.68         | 7.8 |
| Stortjärn | Sweden  | 64.15 | 19.45   | lake  | 550     | 20 | 26-06         | 07-08       | 42              | 0.63      | 3.8       | 305       | 11        | 2.2          | 5.2 |
| Croche    | Canada  | 45.99 | -74.00  | lake  | 2500    | 20 | 22-06         | 03-08       | 42              | 0.26      | 2.74      | 210       | 6.7       | 0.31         | 6.2 |
| George    | USA     | 43.34 | -73.38  | land  | 1000    | 30 | 10-07         | 21-08       | 41              | 18        | 11        | 125       | 4         | 1.8          | 7.6 |
| Opeongo   | Canada  | 45.70 | -78.36  | land  | 180     | 30 | 29-06         | 11-08       | 42              | 1.74      | 2.58      | 340       | 11.8      | 6            | 7.1 |
| Kraus     | USA     | 40.20 | -83.06  | land  | 300     | 32 | 06-07         | 24-07       | 42              | 1         | 5.51      | 2740      | 120       | 14.7         | 8.6 |
| Hertel    | Canada  | 45.54 | -73.22  | land  | 80      | 20 | 26-06         | 08-08       | 43              | 0.895     | 10.72     | 275       | 23        | 5.6          | 7.4 |
| KBS       | USA     | 42.40 | -85.41  | land  | 345     | 21 | 28-06         | 09-08       | 42              | 8.86      | 33.2      | 1320      | 10.3      | 1.65         | 9   |
| Feresjön  | Sweden  | 57.17 | 14.81   | lake  | 550     | 20 | 03-07         | 14-08       | 42              | 6.52      | 4.68      | 320       | 1.49      | 2.02         | 7.6 |
| Erken     | Sweden  | 59.84 | 18.58   | lake  | 550     | 20 | 26-06         | 10-08       | 46              | 11        | 42.9      | 624       | 23.8      | 1.07         | 7.9 |
| Convict   | USA     | 37.58 | -118.85 | land  | 1000    | 30 | 13-07         | 23-08       | 51              | 0.45      | 26.3      | 110       | 7         | 0.23         | 8.6 |

|            |       |       |      |      |       |      |       |       |      |      |      |      |       |      |     |
|------------|-------|-------|------|------|-------|------|-------|-------|------|------|------|------|-------|------|-----|
| Tavernoles | Spain | 41.95 | 2.31 | land | 200   | 20   | 11-08 | 20-12 | 42   | 11.3 | 75   | 8110 | 530   | 9.93 | 7.7 |
| MEDIAN     |       |       |      |      | 447.5 | 25.5 |       |       | 42   | 4.1  | 15.4 | 325  | 10.6  | 1.9  | 7.6 |
| MEAN       |       |       |      |      | 631   | 25   |       |       | 43.4 | 6.5  | 22.7 | 1019 | 53.4  | 3.4  | 8.0 |
| STDEV      |       |       |      |      | 645.9 | 5    |       |       | 2.8  | 6.6  | 21.8 | 2000 | 130.7 | 3.9  | 0.9 |

## APPENDIX 2

**Table 2.1.** Nominal chloride concentrations and the mass of NaCl added (on a per liter basis) for 20- and 30-mesocosm experiments.

| <i>30 mesocosms</i> |                      |           | <i>20 mesocosms</i> |                      |           |
|---------------------|----------------------|-----------|---------------------|----------------------|-----------|
| Enclosure           | Cl <sup>-</sup> mg/L | NaCl mg/L | Enclosure           | Cl <sup>-</sup> mg/L | NaCl mg/L |
| 1                   | 0                    | 0         | 1                   | 0                    | 0         |
| 2                   | 10                   | 16.48     | 2                   | 20                   | 32.97     |
| 3                   | 20                   | 32.97     | 3                   | 40                   | 65.94     |
| 4                   | 40                   | 65.94     | 4                   | 60                   | 98.91     |
| 5                   | 60                   | 98.91     | 5                   | 80                   | 131.88    |
| 6                   | 80                   | 131.88    | 6                   | 100                  | 164.85    |
| 7                   | 100                  | 164.85    | 7                   | 150                  | 247.27    |
| 8                   | 120                  | 197.81    | 8                   | 200                  | 329.69    |
| 9                   | 140                  | 230.78    | 9                   | 250                  | 412.11    |
| 10                  | 160                  | 263.75    | 10                  | 300                  | 494.54    |
| 11                  | 200                  | 329.69    | 11                  | 400                  | 659.38    |
| 12                  | 250                  | 412.11    | 12                  | 500                  | 824.23    |
| 13                  | 300                  | 494.54    | 13                  | 600                  | 989.07    |
| 14                  | 350                  | 576.96    | 14                  | 700                  | 1153.92   |
| 15                  | 400                  | 659.38    | 15                  | 800                  | 1318.76   |
| 16                  | 450                  | 741.80    | 16                  | 900                  | 1483.61   |
| 17                  | 500                  | 824.23    | 17                  | 1000                 | 1648.45   |
| 18                  | 550                  | 906.65    | 18                  | 1100                 | 1813.30   |
| 19                  | 600                  | 989.07    | 19                  | 1300                 | 2142.99   |
| 20                  | 650                  | 1071.49   | 20                  | 1500                 | 2472.68   |
| 21                  | 700                  | 1153.92   |                     |                      |           |
| 22                  | 750                  | 1236.34   |                     |                      |           |
| 23                  | 800                  | 1318.76   |                     |                      |           |
| 24                  | 850                  | 1401.18   |                     |                      |           |
| 25                  | 900                  | 1483.61   |                     |                      |           |
| 26                  | 1000                 | 1648.45   |                     |                      |           |
| 27                  | 1100                 | 1813.30   |                     |                      |           |
| 28                  | 1200                 | 1978.14   |                     |                      |           |
| 29                  | 1300                 | 2142.99   |                     |                      |           |
| 30                  | 1500                 | 2472.68   |                     |                      |           |

## APPENDIX 3

### ***Conversion of conductivity to chloride***

For three of the sixteen experiments (KBS, Kraus, Sturgeon) we lacked direct Cl<sup>-</sup> measurements. For these experiments we used conductivity measurements to estimate initial (week 0) and final (week 6) Cl<sup>-</sup> concentrations. We calculated regressions between conductivity and nominal Cl<sup>-</sup> levels and then used the regressions to convert initial and final conductivity measures into predicted Cl<sup>-</sup> (Figure 3.1). To determine the accuracy of this method, we used the same regression method for experiments that had both initial conductivity and Cl<sup>-</sup> measurements. We used initial measurements because we assumed actual and nominal Cl<sup>-</sup> values would be the closest shortly after NaCl addition, before rainfall and evaporation effects. We then regressed predicted Cl<sup>-</sup> values versus actual Cl<sup>-</sup> as measured in the mesocosms. In Table 3.1, we report the R-squared values and the average absolute difference in mg Cl<sup>-</sup>/L for 'actual estimated Cl<sup>-</sup>' vs 'actual Cl<sup>-</sup>' for all experiments that had initial conductivity and Cl<sup>-</sup> measurements. In control tanks (no Cl<sup>-</sup> added) for Kraus and KBS, the regression method estimated small negative Cl<sup>-</sup> values. We replaced these negative values for the controls with 0 mg Cl<sup>-</sup>/l.

Observations from experiments that had actual Cl<sup>-</sup> estimates for week 0 and 6 showed changes in Cl<sup>-</sup>, in some cases due to known instances of high evaporation or rainfall (Figure 3.2). To account for variable Cl<sup>-</sup> values over the six-week period, we predicted Cl<sup>-</sup> values from conductivity using the regression method for experiments that did not have both initial and final Cl<sup>-</sup> values. For Feresjön, initial Cl<sup>-</sup> values were only available for week 3, not week 0. For Croche, only initial actual Cl<sup>-</sup> values were used for week 0 because predicted Cl<sup>-</sup> values for final Cl<sup>-</sup> were overestimated at low concentrations, and observations of Cl<sup>-</sup> and conductivity for both in-lake mesocosms showed very little change over time. We expect evaporation and rainfall effects on chloride to be much smaller for in-lake mesocosms due to larger volumes and lower temperature fluctuations compared to land-based mesocosms.

### *Nominal versus actual Cl<sup>-</sup> comparisons*

To estimate the accuracy of our Cl<sup>-</sup> levels compared to our target (i.e., nominal) values, we calculated the percent deviation of Cl<sup>-</sup> levels for each mesocosm in week 0 (Figure 3.3). This value was calculated as:  $\frac{|actual\ chloride - nominal\ chloride|}{nominal\ chloride}$ . We then calculated the average and standard deviation of the percent deviation for each lake (Table 3.2).

**Table 3.1.** Results of the analysis to describe error in predicting Cl<sup>-</sup> concentrations using conductivity levels in mesocosms. The R-squared values represent the fit between predicted Cl<sup>-</sup> concentrations and actual Cl<sup>-</sup> concentrations for lakes that had both conductivity and Cl<sup>-</sup> data. The mean difference shows the error in predicting Cl<sup>-</sup> concentrations for each mesocosm when using conductivity. The mesocosm volume and venue are also included to provide context for potential sources of error when constructing the conductivity-nominal Cl<sup>-</sup> relationship used to predict actual Cl<sup>-</sup> concentrations.

| <b>Lake</b> | <b>R-squared</b> | <b>Mean difference<br/>(mg/L Cl<sup>-</sup>)</b> | <b>Mesocosm<br/>volume (L)</b> | <b>Venue</b> |
|-------------|------------------|--------------------------------------------------|--------------------------------|--------------|
| Paint       | 0.998            | -23.473                                          | 800                            | Land-based   |
| Long        | 0.996            | 54.264                                           | 1570                           | In-lake      |
| Purdue      | 0.973            | -3.420                                           | 150                            | Land-based   |
| Stortjärn   | 0.974            | 109.663                                          | 550                            | In lake      |
| Croche      | 0.986            | 102.377                                          | 2500                           | In-lake      |
| George      | 0.993            | -33.051                                          | 1000                           | Land-based   |
| Opeongo     | 0.994            | 45.041                                           | 180                            | Land-based   |
| Hertel      | 0.996            | 27.848                                           | 80                             | Land-based   |
| Erken       | 0.995            | 1.983                                            | 550                            | In lake      |
| Tavernoles  | 0.886            | -186.450                                         | 200                            | Land-based   |

**Table 3.2.** Values of average and standard deviation (SD) of the percent deviation from the nominal Cl<sup>-</sup> levels in week 0 across lakes.

| <b>Lake</b>   | <b>Average percent deviation</b> | <b>SD of the percent deviation</b> |
|---------------|----------------------------------|------------------------------------|
| Paint         | 26.43                            | 38.36                              |
| Long          | 13.29                            | 6.35                               |
| Dartmouth     | 10.14                            | 14.4                               |
| Sturgeon      | 7.7                              | 7.92                               |
| Purdue        | 4.75                             | 10.14                              |
| Stortjärn     | 23.31                            | 18.43                              |
| Croche        | 23.23                            | 14.82                              |
| George        | 17.34                            | 33.8                               |
| Opeongo       | 9.12                             | 5.26                               |
| Kraus         | 25.22                            | 53.51                              |
| Hertel        | 6.77                             | 3.64                               |
| KBS Reservoir | 10.85                            | 25.47                              |
| Feresjön*     | 8.76                             | 9.09                               |
| Erken         | 9.95                             | 14.58                              |
| Convict       | 28.19                            | 19.17                              |
| Tavernoles    | 13.64                            | 25.78                              |

\*based on initial Cl<sup>-</sup> in week 3



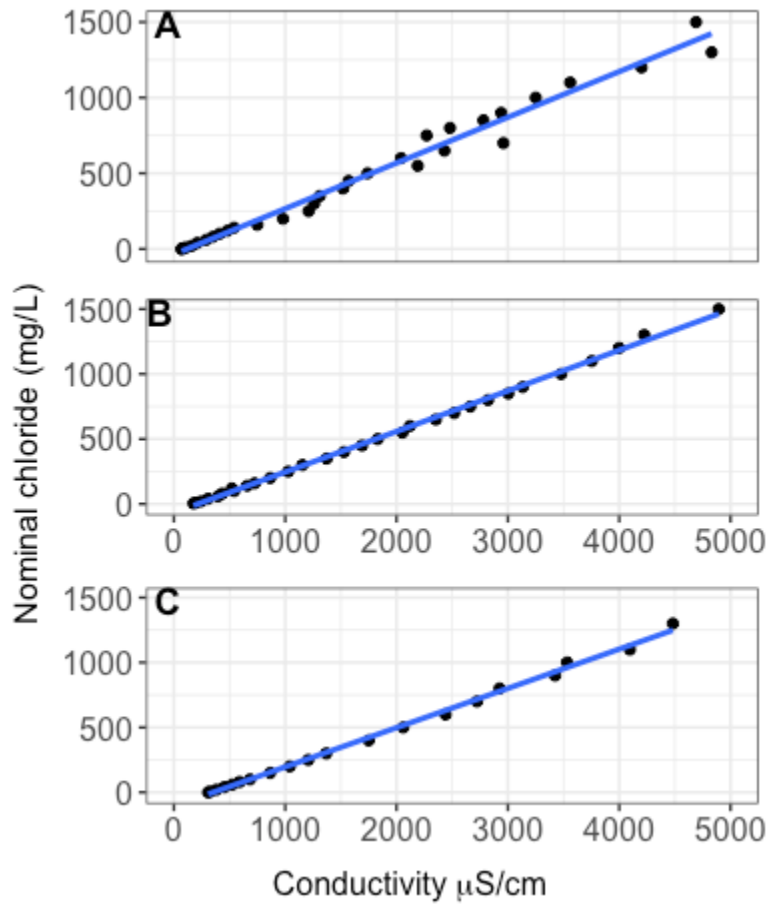

**Figure 3.1.** Relationship between conductivity and nominal  $\text{Cl}^-$  concentrations for (A) Kraus Lake, (B) Sturgeon Lake, and (C) KBS Reservoir using data collected at week 0 (initial) in the experiments. The R-squared values for all fits were  $>0.98$ .

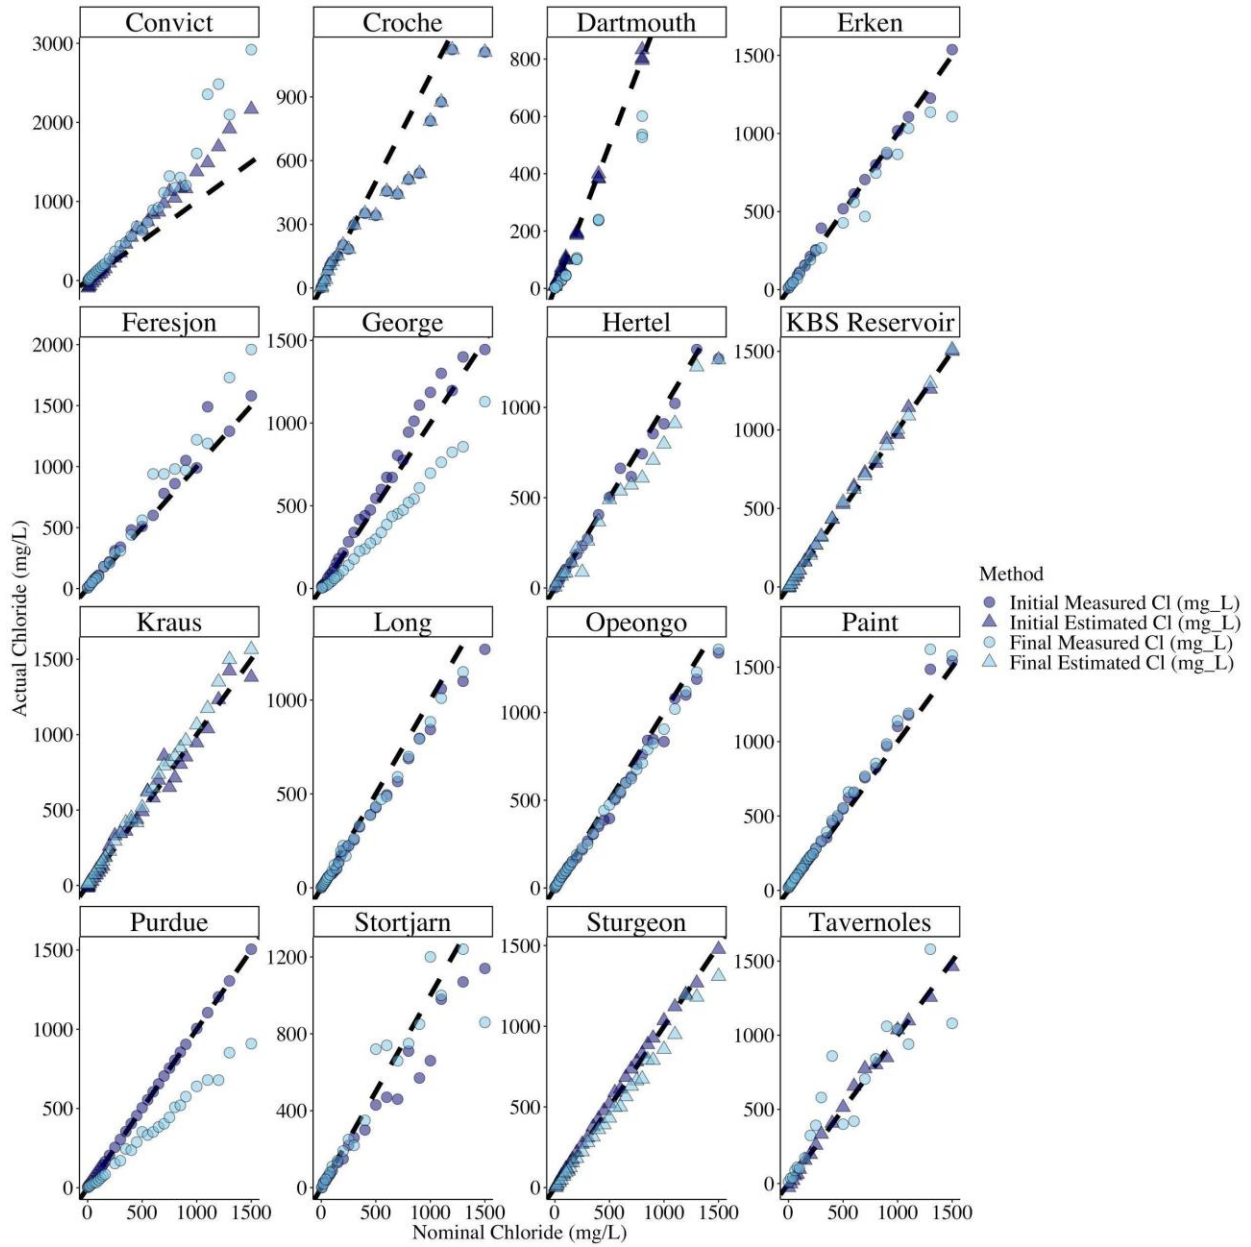

**Figure 3.2.** Relationship between nominal Cl<sup>-</sup> concentrations actual Cl<sup>-</sup> values. Initial chloride measurements from week 0 = gray, final chloride measurements from week 6 = light blue. Circles represent actual Cl<sup>-</sup> measurements. Triangles represent estimated Cl<sup>-</sup> values from conductivity values. The 1:1 ratio is indicated with a dashed line. Feresjön initial Cl<sup>-</sup> measurements are from week 3. Croche final measurements are not shown because they were not used in the averaged Cl<sup>-</sup> measurements due to errors in estimation at low nominal Cl<sup>-</sup> levels.

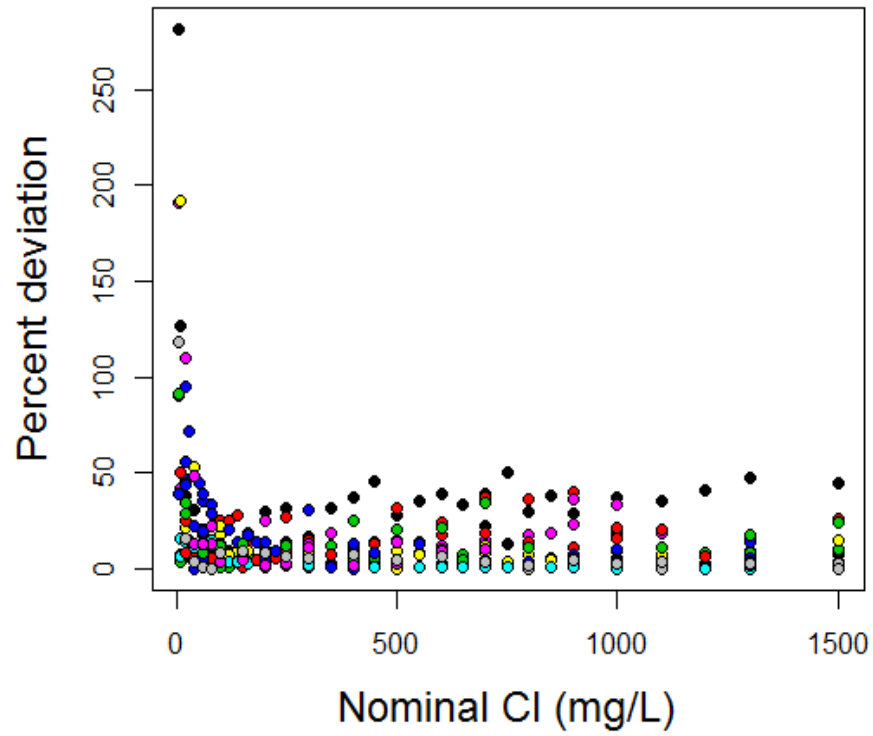

**Figure 3.3.** Percent deviation of actual Cl<sup>-</sup> values from nominal concentrations. Data are shown for each lake (coded by color) in week 0.

## APPENDIX 4

Individual site responses of calanoid copepods, cyclopoid copepods, rotifers, and chlorophyll *a* to Cl<sup>-</sup> gradients (cladoceran figure reported in main paper).

**Table 4.1.** Model comparison table for cladoceran abundance in the 16 study sites, including delta AICc and adjusted R<sup>2</sup> values and whether the relationship was used to predict an LC<sub>50</sub>. For consistency, we only used GAM models with log(abundance + 1) to predict LC<sub>50</sub> (in bold). The “Used for LC<sub>50</sub>” column indicates if there was enough data and the shape of the curve permitted us to calculate LC<sub>50</sub> (see methods for more details). Models considered included linear (lm) and generalized additive (gam) models with abundance (ab), log(abundance + 1) (logab), log(Cl<sup>-</sup> concentration + 1) (logcl), and both variables log-transformed (loglog). Table shows models within 2 ΔAIC and GAM models with log(abundance + 1).

| Lake             | Model            | Delta AICc  | Adjusted R <sup>2</sup> | Used for LC <sub>50</sub> |
|------------------|------------------|-------------|-------------------------|---------------------------|
| <b>Paint</b>     | <b>gam.logab</b> | <b>0.00</b> | <b>0.777</b>            | <b>Y</b>                  |
| Long             | lm.loglog        | 0.00        | 0.441                   | N                         |
| <b>Long</b>      | <b>gam.logab</b> | <b>2.15</b> | <b>0.459</b>            | <b>Y</b>                  |
| Dartmouth        | lm.logab         | 0.00        | 0.720                   | N                         |
| <b>Dartmouth</b> | <b>gam.logab</b> | <b>0.80</b> | <b>0.726</b>            | <b>Y</b>                  |
| Sturgeon         | lm.logab         | 0.00        | 0.640                   | N                         |
| <b>Sturgeon</b>  | <b>gam.logab</b> | <b>0.87</b> | <b>0.672</b>            | <b>Y</b>                  |
| Purdue           | lm.logab         | 0.00        | 0.762                   | N                         |
| <b>Purdue</b>    | <b>gam.logab</b> | <b>0.77</b> | <b>0.766</b>            | <b>Y</b>                  |
| <b>Stortjärn</b> | <b>gam.logab</b> | <b>0.00</b> | <b>0.879</b>            | <b>Y</b>                  |
| <b>Croche</b>    | <b>gam.logab</b> | <b>0.00</b> | <b>0.837</b>            | <b>Y</b>                  |
| George           | lm.logab         | 0.00        | 0.582                   | N                         |
| <b>George</b>    | <b>gam.logab</b> | <b>0.90</b> | <b>0.607</b>            | <b>Y</b>                  |
| Opeongo          | lm.logab         | 0.00        | 0.218                   | N                         |
| <b>Opeongo</b>   | <b>gam.logab</b> | <b>0.00</b> | <b>0.218</b>            | <b>Y</b>                  |
| Kraus            | lm.logab         | 0.00        | 0.774                   | N                         |

|                      |                  |             |              |          |
|----------------------|------------------|-------------|--------------|----------|
| <b>Kraus</b>         | <b>gam.logab</b> | <b>0.00</b> | <b>0.774</b> | <b>Y</b> |
| Hertel               | lm.logab         | 0.00        | 0.556        | N        |
| <b>Hertel</b>        | <b>gam.logab</b> | <b>0.82</b> | <b>0.565</b> | <b>Y</b> |
| <b>KBS Reservoir</b> | <b>gam.logab</b> | <b>0.00</b> | <b>0.929</b> | <b>Y</b> |
| Feresjön             | lm.logab         | 0.00        | 0.687        | N        |
| <b>Feresjön</b>      | <b>gam.logab</b> | <b>2.07</b> | <b>0.796</b> | <b>Y</b> |
| Erken                | lm.logab         | 0.00        | 0.251        | N        |
| <b>Erken</b>         | <b>gam.logab</b> | <b>0.20</b> | <b>0.429</b> | <b>Y</b> |
| <b>Convict</b>       | <b>gam.logab</b> | <b>0.00</b> | <b>0.782</b> | <b>Y</b> |

---

**Table 4.2.** Model comparison table for cyclopoid copepod abundance in the 16 study sites, including delta AICc and adjusted R<sup>2</sup> values and whether the relationship was used to predict an LC<sub>50</sub>. For consistency, we only used GAM models with log(abundance + 1) to predict LC<sub>50</sub> (in bold). The “Used for LC<sub>50</sub>” column indicates if there was enough data and the shape of the curve permitted us to calculate LC<sub>50</sub> (see methods for more details). Models considered included linear (lm) and generalized additive (gam) models with abundance (ab), log(abundance + 1) (logab), log(Cl<sup>-</sup> concentration + 1) (logcl), and both variables log-transformed (loglog). Table shows models within 2 ΔAIC and GAM models with log(abundance + 1).

| Lake             | Model            | Delta AICc  | Adjusted R <sup>2</sup> | Used for LC <sub>50</sub> |
|------------------|------------------|-------------|-------------------------|---------------------------|
| <b>Paint</b>     | <b>gam.logab</b> | <b>0.00</b> | <b>0.934</b>            | <b>Y</b>                  |
| Long             | lm.loglog        | 0.00        | 0.369                   | N                         |
| <b>Long</b>      | <b>gam.logab</b> | <b>6.75</b> | <b>0.297</b>            | <b>N</b>                  |
| Dartmouth        | lm.logab         | 0.00        | 0.047                   | N                         |
| <b>Dartmouth</b> | <b>gam.logab</b> | <b>0.14</b> | <b>0.049</b>            | <b>Y</b>                  |
| Dartmouth        | lm.loglog        | 1.29        | -0.013                  | N                         |
| <b>Sturgeon</b>  | <b>gam.logab</b> | <b>0.00</b> | <b>0.895</b>            | <b>Y</b>                  |
| Purdue           | lm.logab         | 0.00        | -0.033                  | N                         |
| Purdue           | lm.loglog        | 0.07        | -0.036                  | N                         |
| <b>Purdue</b>    | <b>gam.logab</b> | <b>0.68</b> | <b>0.020</b>            | <b>N</b>                  |
| Stortjärn        | lm.loglog        | 0.00        | 0.492                   | N                         |
| <b>Stortjärn</b> | <b>gam.logab</b> | <b>2.22</b> | <b>0.653</b>            | <b>Y</b>                  |
| Croche           | lm.loglog        | 0.00        | 0.315                   | N                         |
| <b>Croche</b>    | <b>gam.logab</b> | <b>6.95</b> | <b>0.184</b>            | <b>Y</b>                  |
| George           | lm.loglog        | 0.00        | 0.119                   | N                         |
| George           | lm.logab         | 0.33        | 0.110                   | N                         |
| <b>George</b>    | <b>gam.logab</b> | <b>0.33</b> | <b>0.110</b>            | <b>Y</b>                  |
| <b>Opeongo</b>   | <b>gam.logab</b> | <b>0.00</b> | <b>0.585</b>            | <b>Y</b>                  |

|                      |                  |             |              |          |
|----------------------|------------------|-------------|--------------|----------|
| Opeongo              | lm.logab         | 0.05        | 0.526        | N        |
| Kraus                | lm.logab         | 0.00        | 0.496        | N        |
| <b>Kraus</b>         | <b>gam.logab</b> | <b>0.00</b> | <b>0.496</b> | <b>Y</b> |
| Hertel               | lm.logab         | 0.00        | 0.039        | N        |
| <b>Hertel</b>        | <b>gam.logab</b> | <b>0.00</b> | <b>0.039</b> | <b>N</b> |
| Hertel               | lm.loglog        | 0.69        | 0.005        | N        |
| <b>KBS Reservoir</b> | <b>gam.logab</b> | <b>0.00</b> | <b>0.806</b> | <b>Y</b> |
| <b>Feresjön</b>      | <b>gam.logab</b> | <b>0.00</b> | <b>0.907</b> | <b>Y</b> |
| Erken                | lm.loglog        | 0.00        | 0.036        | N        |
| Erken                | lm.logab         | 0.50        | 0.009        | N        |
| <b>Erken</b>         | <b>gam.logab</b> | <b>0.50</b> | <b>0.009</b> | <b>Y</b> |
| <b>Convict</b>       | <b>gam.logab</b> | <b>0.00</b> | <b>0.427</b> | <b>Y</b> |
| Convict              | lm.logab         | 0.47        | 0.335        | N        |
| Tavernoles           | lm.logab         | 0.00        | 0.407        | N        |
| <b>Tavernoles</b>    | <b>gam.logab</b> | <b>0.00</b> | <b>0.407</b> | <b>Y</b> |

---

**Table 4.3.** Model comparison table for calanoid copepod abundance in the 16 study sites, including delta AICc and adjusted R<sup>2</sup> values and whether the relationship was used to predict an LC<sub>50</sub>. For consistency, we only used GAM models with log(abundance + 1) to predict LC<sub>50</sub> (in bold). The “Used for LC<sub>50</sub>” column indicates if there was enough data and the shape of the curve permitted us to calculate LC<sub>50</sub> (see methods for more details). Models considered included linear (lm) and generalized additive (gam) models with abundance (ab), log(abundance + 1) (logab), log(Cl<sup>-</sup> concentration + 1) (logcl), and both variables log-transformed (loglog). Table shows models within 2 ΔAIC and GAM models with log(abundance + 1).

| Lake             | Model            | Delta AICc   | Adjusted R <sup>2</sup> | Used for LC <sub>50</sub> |
|------------------|------------------|--------------|-------------------------|---------------------------|
| Paint            | lm.loglog        | 0.00         | 0.188                   | N                         |
| Paint            | lm.logab         | 1.21         | 0.152                   | N                         |
| <b>Paint</b>     | <b>gam.logab</b> | <b>1.82</b>  | <b>0.206</b>            | <b>N</b>                  |
| Dartmouth        | lm.logab         | 0.00         | 0.352                   | N                         |
| <b>Dartmouth</b> | <b>gam.logab</b> | <b>0.72</b>  | <b>0.402</b>            | <b>Y</b>                  |
| Sturgeon         | lm.loglog        | 0.00         | 0.196                   | N                         |
| <b>Sturgeon</b>  | <b>gam.logab</b> | <b>1.88</b>  | <b>0.236</b>            | <b>N</b>                  |
| Stortjärn        | lm.logab         | 0.00         | 0.085                   | N                         |
| <b>Stortjärn</b> | <b>gam.logab</b> | <b>0.00</b>  | <b>0.085</b>            | <b>N</b>                  |
| Stortjärn        | lm.loglog        | 1.03         | 0.037                   | N                         |
| Croche           | lm.loglog        | 0.00         | 0.859                   | N                         |
| <b>Croche</b>    | <b>gam.logab</b> | <b>17.28</b> | <b>0.813</b>            | <b>Y</b>                  |
| George           | lm.logab         | 0.00         | 0.056                   | N                         |
| <b>George</b>    | <b>gam.logab</b> | <b>0.00</b>  | <b>0.056</b>            | <b>N</b>                  |
| George           | lm.loglog        | 1.26         | 0.015                   | N                         |
| Opeongo          | lm.logab         | 0.00         | 0.221                   | N                         |
| <b>Opeongo</b>   | <b>gam.logab</b> | <b>0.95</b>  | <b>0.246</b>            | <b>Y</b>                  |
| Opeongo          | lm.loglog        | 1.80         | 0.165                   | N                         |
| Kraus            | lm.loglog        | 0.00         | 0.574                   | N                         |



|                      |                  |              |              |          |
|----------------------|------------------|--------------|--------------|----------|
| <b>Kraus</b>         | <b>gam.logab</b> | <b>0.31</b>  | <b>0.711</b> | <b>N</b> |
| KBS Reservoir        | lm.loglog        | 0.00         | 0.787        | N        |
| <b>KBS Reservoir</b> | <b>gam.logab</b> | <b>18.06</b> | <b>0.603</b> | <b>Y</b> |
| Feresjön             | lm.loglog        | 0.00         | 0.625        | N        |
| <b>Feresjön</b>      | <b>gam.logab</b> | <b>2.75</b>  | <b>0.727</b> | <b>Y</b> |
| Erken                | lm.loglog        | 0.00         | 0.674        | N        |
| <b>Erken</b>         | <b>gam.logab</b> | <b>10.95</b> | <b>0.576</b> | <b>Y</b> |
| Convict              | lm.loglog        | 0.00         | 0.463        | N        |
| <b>Convict</b>       | <b>gam.logab</b> | <b>15.80</b> | <b>0.183</b> | <b>N</b> |

---

**Table 4.4.** Model comparison table for rotifer abundance in the 16 study sites, including delta AICc and adjusted R<sup>2</sup> values and whether the relationship was used to predict an LC<sub>50</sub>. For consistency, we only used GAM models with log(abundance + 1) to predict LC<sub>50</sub> (in bold). The “Used for LC<sub>50</sub>” column indicates if there was enough data and the shape of the curve permitted us to calculate LC<sub>50</sub> (see methods for more details). Models considered included linear (lm) and generalized additive (gam) models with abundance (ab), log(abundance + 1) (logab), log(Cl<sup>-</sup> concentration + 1) (logcl), and both variables log-transformed (loglog). Table shows models within 2 ΔAIC and GAM models with log(abundance + 1).

| Lake             | Model            | Delta AICc  | Adjusted R <sup>2</sup> | Used for LC <sub>50</sub> |
|------------------|------------------|-------------|-------------------------|---------------------------|
| Paint            | lm.loglog        | 0.00        | 0.482                   | N                         |
| <b>Paint</b>     | <b>gam.logab</b> | <b>4.66</b> | <b>0.429</b>            | <b>Y</b>                  |
| Long             | lm.logab         | 0.00        | 0.228                   | N                         |
| <b>Long</b>      | <b>gam.logab</b> | <b>0.00</b> | <b>0.228</b>            | <b>Y</b>                  |
| Dartmouth        | lm.logab         | 0.00        | -0.044                  | N                         |
| <b>Dartmouth</b> | <b>gam.logab</b> | <b>0.00</b> | <b>-0.044</b>           | <b>N</b>                  |
| Dartmouth        | lm.loglog        | 0.18        | -0.053                  | N                         |
| Purdue           | lm.logab         | 0.00        | 0.048                   | N                         |
| <b>Purdue</b>    | <b>gam.logab</b> | <b>0.00</b> | <b>0.048</b>            | <b>Y</b>                  |
| Purdue           | lm.loglog        | 1.11        | 0.012                   | N                         |
| <b>Stortjärn</b> | <b>gam.logab</b> | <b>0.00</b> | <b>0.761</b>            | <b>Y</b>                  |
| Stortjärn        | lm.logab         | 0.76        | 0.681                   | N                         |
| Croche           | lm.loglog        | 0.00        | 0.289                   | N                         |
| <b>Croche</b>    | <b>gam.logab</b> | <b>8.49</b> | <b>0.464</b>            | <b>N</b>                  |
| <b>George</b>    | <b>gam.logab</b> | <b>0.00</b> | <b>0.396</b>            | <b>Y</b>                  |
| <b>Opeongo</b>   | <b>gam.logab</b> | <b>0.00</b> | <b>0.833</b>            | <b>Y</b>                  |
| Kraus            | lm.loglog        | 0.00        | 0.020                   | N                         |
| Kraus            | lm.logab         | 0.18        | 0.014                   | N                         |
| <b>Kraus</b>     | <b>gam.logab</b> | <b>0.18</b> | <b>0.014</b>            | <b>N</b>                  |
| Hertel           | lm.logab         | 0.00        | 0.543                   | N                         |

|                      |                  |             |               |          |
|----------------------|------------------|-------------|---------------|----------|
| <b>Hertel</b>        | <b>gam.logab</b> | <b>0.00</b> | <b>0.543</b>  | <b>Y</b> |
| KBS Reservoir        | lm.logab         | 0.00        | -0.004        | N        |
| <b>KBS Reservoir</b> | <b>gam.logab</b> | <b>0.00</b> | <b>-0.004</b> | <b>N</b> |
| KBS Reservoir        | lm.loglog        | 0.99        | -0.052        | N        |
| Feresjön             | lm.loglog        | 0.00        | 0.172         | N        |
| Feresjön             | lm.logab         | 1.65        | 0.096         | N        |
| <b>Feresjön</b>      | <b>gam.logab</b> | <b>2.67</b> | <b>0.120</b>  | <b>Y</b> |
| <b>Erken</b>         | <b>gam.logab</b> | <b>0.00</b> | <b>0.575</b>  | <b>N</b> |
| Convict              | lm.logab         | 0.00        | -0.024        | N        |
| <b>Convict</b>       | <b>gam.logab</b> | <b>0.00</b> | <b>-0.024</b> | <b>N</b> |
| Convict              | lm.loglog        | 0.33        | -0.035        | N        |
| <b>Tavernoles</b>    | <b>gam.logab</b> | <b>0.00</b> | <b>0.850</b>  | <b>Y</b> |

---

**Table 4.5.** Model selection table for chlorophyll a concentration, including adjusted R<sup>2</sup> and delta AICc values and whether the relationship was used to predict an LC<sub>50</sub>. Models considered included linear and generalized additive (GAM) models with chlorophyll abundance (chl), log(abundance + 1) (logchl), log(Cl<sup>-</sup> concentration + 1) (logcl), and both variables log-transformed. Table shows models within 2 ΔAIC and GAM models with log(abundance + 1).

| Lake             | Model          | Delta AICc  | Adjusted R <sup>2</sup> |
|------------------|----------------|-------------|-------------------------|
| <b>Paint</b>     | <b>gam.chl</b> | <b>0.00</b> | <b>0.379</b>            |
| Long             | lm.logchl      | 0.00        | 0.192                   |
| <b>Long</b>      | <b>gam.chl</b> | <b>2.77</b> | <b>0.233</b>            |
| Dartmouth        | lm.chl         | 0.00        | 0.089                   |
| <b>Dartmouth</b> | <b>gam.chl</b> | <b>0.00</b> | <b>0.089</b>            |
| Dartmouth        | lm.logchl      | 0.89        | 0.094                   |
| Sturgeon         | lm.chl         | 0.00        | 0.020                   |
| <b>Sturgeon</b>  | <b>gam.chl</b> | <b>0.00</b> | <b>0.020</b>            |
| Sturgeon         | lm.logchl      | 0.73        | -0.029                  |
| <b>Purdue</b>    | <b>gam.chl</b> | <b>0.00</b> | <b>0.772</b>            |
| Purdue           | lm.chl         | 1.21        | 0.294                   |
| Stortjärn        | lm.logchl      | 0.00        | 0.156                   |
| Stortjärn        | lm.chl         | 1.80        | 0.051                   |
| <b>Stortjärn</b> | <b>gam.chl</b> | <b>2.68</b> | <b>0.401</b>            |
| Croche           | lm.logchl      | 0.00        | -0.050                  |
| Croche           | lm.chl         | 0.08        | -0.048                  |
| <b>Croche</b>    | <b>gam.chl</b> | <b>0.08</b> | <b>-0.048</b>           |
| George           | lm.chl         | 0.00        | 0.111                   |
| <b>George</b>    | <b>gam.chl</b> | <b>0.00</b> | <b>0.111</b>            |
| <b>Opeongo</b>   | <b>gam.chl</b> | <b>0.00</b> | <b>0.320</b>            |
| Kraus            | lm.chl         | 0.00        | 0.164                   |
| <b>Kraus</b>     | <b>gam.chl</b> | <b>0.00</b> | <b>0.164</b>            |
| Hertel           | lm.chl         | 0.00        | -0.025                  |

|                      |                |             |              |
|----------------------|----------------|-------------|--------------|
| Hertel               | lm.logchl      | 0.41        | -0.057       |
| <b>Hertel</b>        | <b>gam.chl</b> | <b>0.53</b> | <b>0.386</b> |
| KBS Reservoir        | lm.chl         | 0.00        | 0.002        |
| <b>KBS Reservoir</b> | <b>gam.chl</b> | <b>0.00</b> | <b>0.002</b> |
| KBS Reservoir        | lm.logchl      | 1.41        | -0.011       |
| Feresjön             | lm.chl         | 0.00        | 0.347        |
| <b>Feresjön</b>      | <b>gam.chl</b> | <b>2.68</b> | <b>0.624</b> |
| Erken                | lm.logchl      | 0.00        | -0.019       |
| Erken                | lm.chl         | 0.26        | -0.037       |
| <b>Erken</b>         | <b>gam.chl</b> | <b>1.88</b> | <b>0.063</b> |
| <b>Convict</b>       | <b>gam.chl</b> | <b>0.00</b> | <b>0.920</b> |
| Tavernoles           | lm.chl         | 0.00        | 0.129        |
| <b>Tavernoles</b>    | <b>gam.chl</b> | <b>0.35</b> | <b>0.294</b> |

---

**Table 4.6.** Comparison of the global model of taxon abundance as a function of Cl<sup>-</sup> compared to a model with lake-specific smooth relationships. Bolded models are the best fit model for each taxonomic group.

| Taxa       | Model                       | AIC         | R <sup>2</sup> <sub>adj</sub> | Est. df | F    | p      |
|------------|-----------------------------|-------------|-------------------------------|---------|------|--------|
| Cladoceran | s(chloride)                 | 1241        | 0.66                          | 5.1     | 68.2 | <0.001 |
|            | <b>s(chloride, by=lake)</b> | <b>1124</b> | <b>0.77</b>                   |         |      |        |
| Calanoid   | s(chloride)                 | 636         | 0.40                          | 3.4     | 22.7 | <0.001 |
|            | <b>s(chloride, by=lake)</b> | <b>618</b>  | <b>0.47</b>                   |         |      |        |
| Cyclopoid  | s(chloride)                 | 1086        | 0.68                          | 1.9     | 70.6 | <0.001 |
|            | <b>s(chloride, by=lake)</b> | <b>830</b>  | <b>0.85</b>                   |         |      |        |
| Rotifer    | s(chloride)                 | 1324        | 0.58                          | 4.7     | 10.2 | <0.001 |
|            | <b>s(chloride, by=lake)</b> | <b>1172</b> | <b>0.75</b>                   |         |      |        |

**Table 4.7.** GAM results for the models with site-specific smooth relationships between taxon abundance and Cl' including the estimated degrees of freedom (edf), F-values, and p-values for each smoothed term. Bolded relationships are significant at p<0.05.

|               | Cladocerans |             |                  | Calanoids  |             |                  | Cyclopoids |             |                  | Rotifer    |             |                  |               |
|---------------|-------------|-------------|------------------|------------|-------------|------------------|------------|-------------|------------------|------------|-------------|------------------|---------------|
|               | edf         | F           | p                | edf        | F           | p                | edf        | F           | p                | edf        | F           | p                |               |
| Paint         | <b>2.6</b>  | <b>22.7</b> | <b>&lt;0.001</b> | 1          | 0.5         | 0.4846           | <b>5.1</b> | <b>12.8</b> | <b>&lt;0.001</b> | <b>5.9</b> | <b>7.3</b>  | <b>&lt;0.001</b> |               |
| Long          | <b>2</b>    | <b>11.8</b> | <b>&lt;0.001</b> |            |             |                  | 1          | 0           | 0.854            | <b>1</b>   | <b>12.6</b> | <b>&lt;0.001</b> |               |
| Dartmouth     | <b>1</b>    | <b>34.4</b> | <b>&lt;0.001</b> | 1.3        | 2.4         | 0.057            | 1.1        | 1.4         | 0.1971           | 1.3        | 0.2         | 0.725            |               |
| Sturgeon      | <b>3.7</b>  | <b>34.8</b> | <b>&lt;0.001</b> | <b>3</b>   | <b>6</b>    | <b>&lt;0.001</b> | <b>3.9</b> | <b>70.2</b> | <b>&lt;0.001</b> |            |             |                  |               |
| Purdue        | <b>1.1</b>  | <b>64.8</b> | <b>&lt;0.001</b> |            |             |                  | 1.9        | 1.5         | 0.255            | 1          | 2.3         | 0.1281           |               |
| Stortjärn     | <b>3.2</b>  | <b>28.4</b> | <b>&lt;0.001</b> | <b>1</b>   | <b>9.5</b>  | <b>0.0022</b>    | 1.3        | 1.4         | 0.1779           | <b>1.8</b> | <b>14.4</b> | <b>&lt;0.001</b> |               |
| Croche        | <b>2.1</b>  | <b>6.5</b>  | <b>0.001</b>     | <b>2.1</b> | <b>4.3</b>  | <b>0.0158</b>    | 1          | 0.6         | 0.4526           | 3.9        | 0.9         | 0.3215           |               |
| George        | <b>6.6</b>  | <b>8.5</b>  | <b>&lt;0.001</b> | 1          | 0.8         | 0.3787           | <b>1</b>   | <b>6.5</b>  | <b>0.011</b>     | <b>6.7</b> | <b>6.7</b>  | <b>&lt;0.001</b> |               |
| Opeongo       | <b>5</b>    | <b>7.7</b>  | <b>&lt;0.001</b> | <b>2.3</b> | <b>11.6</b> | <b>&lt;0.001</b> | <b>6.1</b> | <b>25.1</b> | <b>&lt;0.001</b> | <b>5.6</b> | <b>17.9</b> | <b>&lt;0.001</b> |               |
| Kraus         | <b>1</b>    | <b>30</b>   | <b>&lt;0.001</b> | <b>4.9</b> | <b>3.5</b>  | <b>0.002</b>     | <b>1</b>   | <b>17.8</b> | <b>&lt;0.001</b> | <b>1</b>   | 2.3         | 0.1289           |               |
| Hertel        | <b>1</b>    | <b>17.6</b> | <b>&lt;0.001</b> |            |             |                  | 1          | 0.3         | 0.5935           | <b>1</b>   | <b>8.8</b>  | <b>0.0033</b>    |               |
| KBS Reservoir | <b>3.3</b>  | <b>18.4</b> | <b>&lt;0.001</b> | <b>2.5</b> | <b>11</b>   | <b>&lt;0.001</b> | <b>2</b>   | <b>20.7</b> | <b>&lt;0.001</b> | 1          | 0.5         | 0.4821           |               |
| Feresjön      | <b>2.9</b>  | <b>8.4</b>  | <b>&lt;0.001</b> | 1          | 0.7         | 0.4025           | <b>4.5</b> | <b>12.9</b> | <b>&lt;0.001</b> | 1.1        | 1.7         | 0.151            |               |
| Erken         | <b>2.1</b>  | <b>4.7</b>  | <b>0.008</b>     | <b>2.6</b> | <b>4.7</b>  | <b>0.0022</b>    | 3.2        | 1.9         | 0.1031           | <b>4.2</b> | <b>9</b>    | <b>&lt;0.001</b> |               |
| Convict       | <b>3.2</b>  | <b>14.6</b> | <b>&lt;0.001</b> | 1          | 0.3         | 0.5672           | <b>2.7</b> | <b>6.9</b>  | <b>&lt;0.001</b> | 1          | 0           | 0.9553           |               |
| Tavernoles    |             |             |                  |            |             |                  | <b>5.5</b> | <b>3.9</b>  | <b>&lt;0.001</b> | <b>6</b>   | <b>2.1</b>  | <b>4.5</b>       | <b>0.0089</b> |

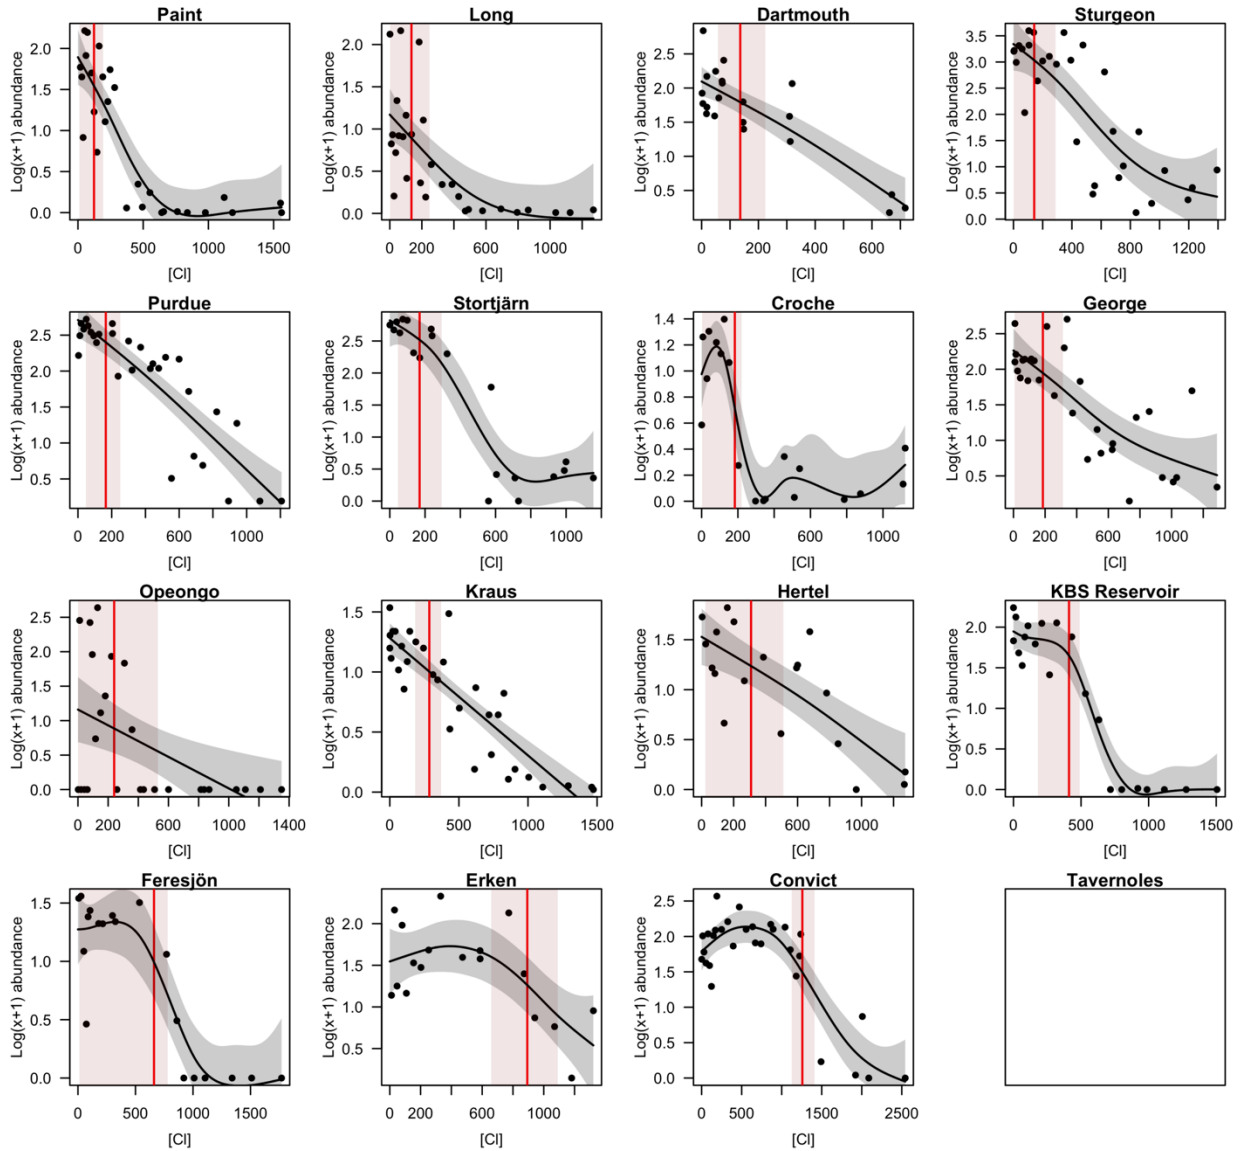

**Figure 4.1.** Predicted relationship between  $\log_{10}(x+1)$  cladoceran abundance and  $\text{Cl}^-$  concentration using generalized additive models (GAMs) for 15 study sites throughout North America and Europe. Red vertical line indicates the  $\text{LC}_{50}$  value for each site with the associated 95% confidence intervals (shaded region around the vertical line). Cladocerans were not detected in the experiment at Tavernoles.



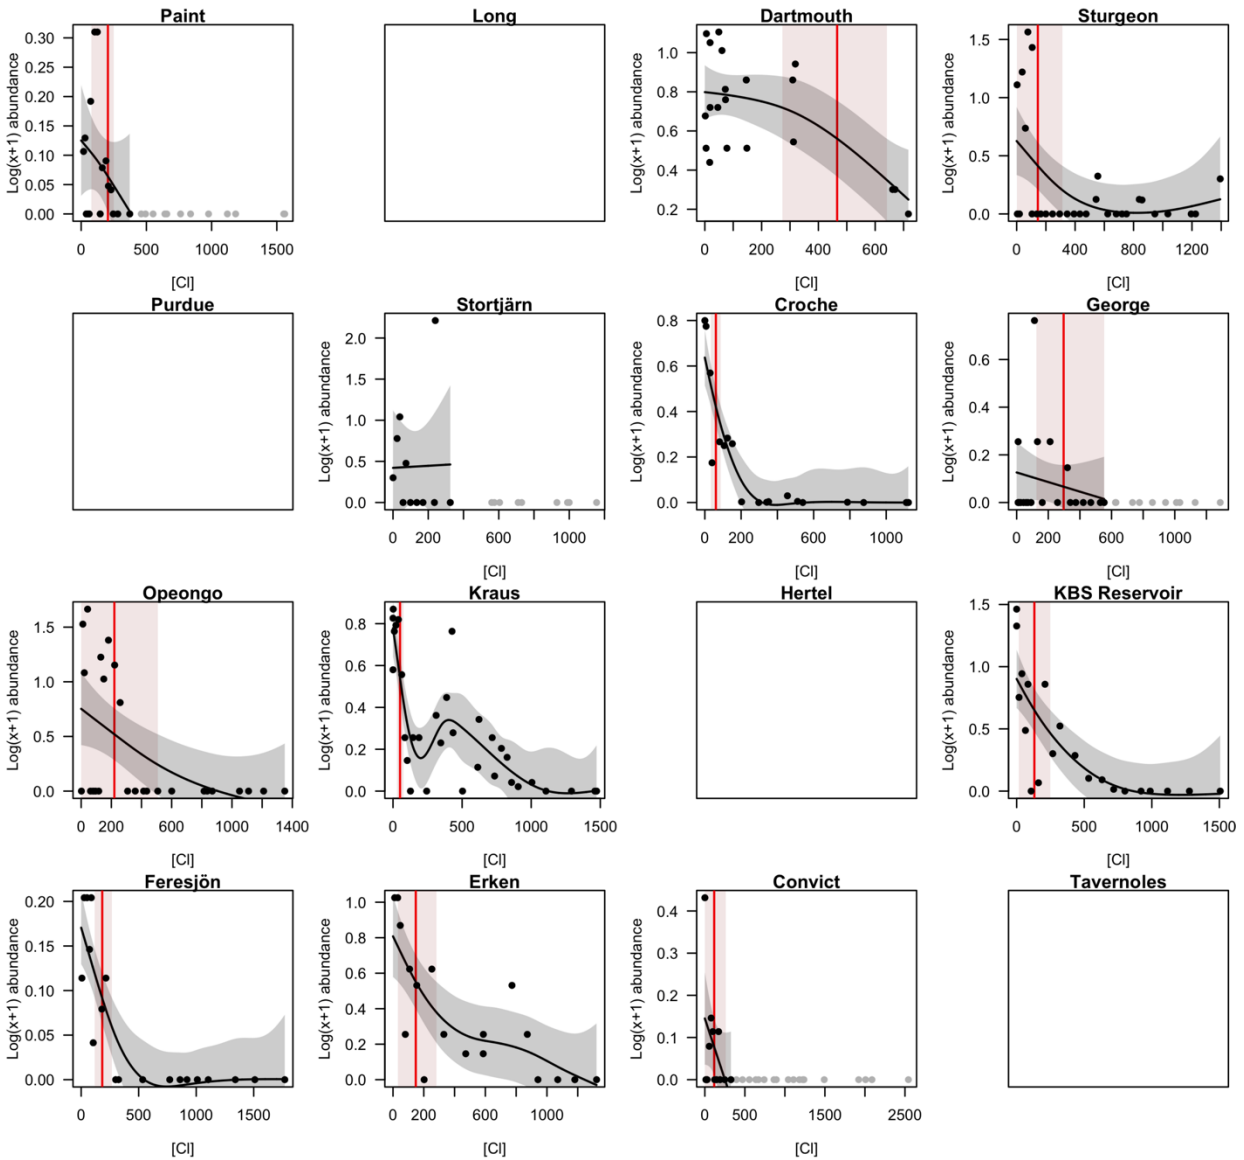

**Figure 4.2.** Predicted relationship between  $\log_{10}(x+1)$  calanoid abundance and  $\text{Cl}^-$  concentration using generalized additive models (GAMs) for 12 study sites throughout North America and Europe where calanoids were detected. Red vertical line indicates the  $\text{LC}_{50}$  value for each site with the associated 95% confidence intervals (shaded region around the vertical line). Points in gray were not used in fitting the GAMs;  $\text{Cl}^-$  gradients were truncated to improve model fit when the decline in abundance was steep and no individuals were detected at high  $\text{Cl}^-$  concentrations.  $\text{LC}_{50}$  was not estimated for Stortjärn because the GAM model did not detect a change in abundance along the chloride gradient.

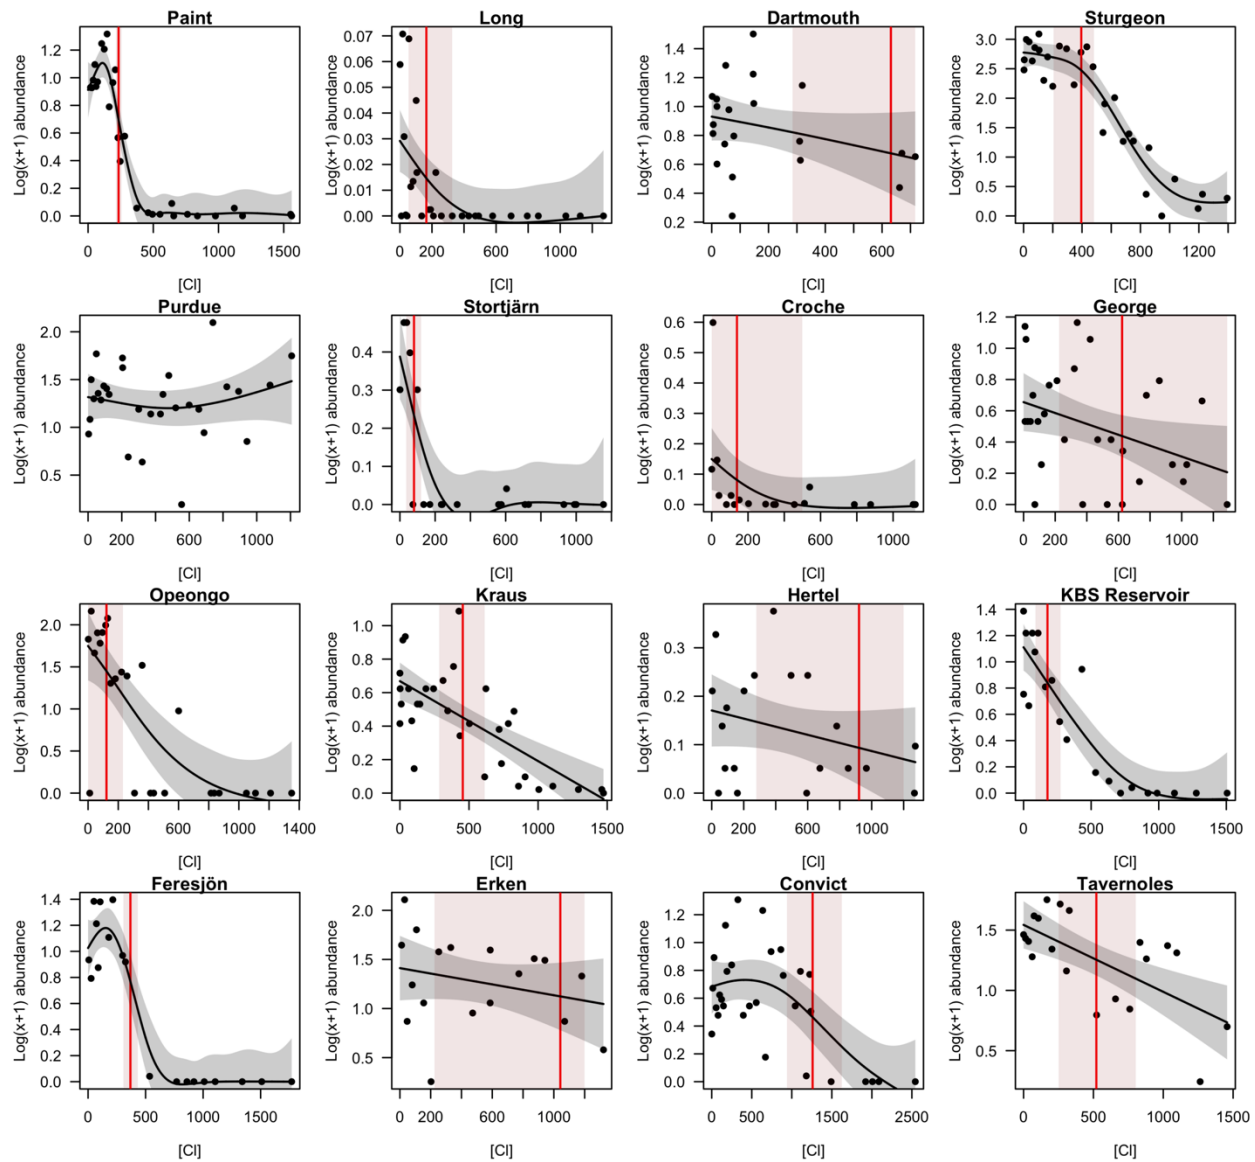

**Figure 4.3.** Predicted relationship between  $\log_{10}(x+1)$  cyclopid abundance and  $\text{Cl}^-$  concentration using generalized additive models (GAMs) for 16 study sites throughout North America and Europe. Red vertical line indicates the  $\text{LC}_{50}$  value for each site with the associated 95% confidence intervals (shaded region around the vertical line).  $\text{LC}_{50}$  was not calculated for Purdue because abundance did not decline with increasing  $\text{Cl}^-$  concentration.

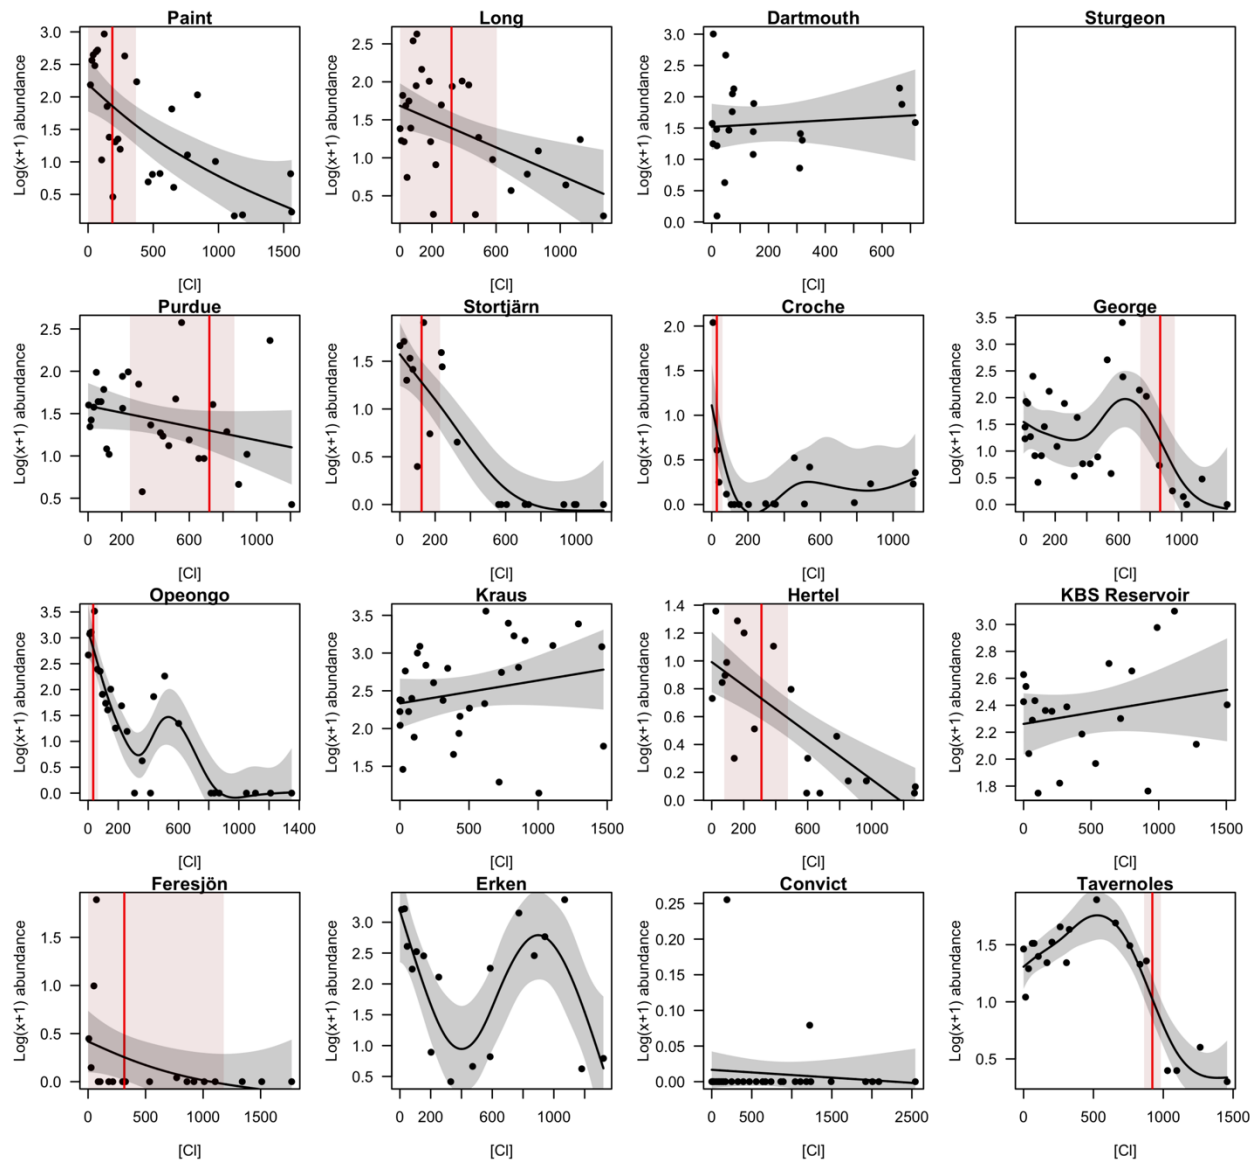

**Figure 4.4.** Predicted relationship between  $\log_{10}(x+1)$  rotifer abundance and  $\text{Cl}^-$  concentration using generalized additive models (GAMs) for 15 study sites throughout North America and Europe where rotifers were enumerated. Red vertical line indicates the  $\text{LC}_{50}$  value for each site with the associated 95% confidence intervals (shaded region around the vertical line).  $\text{LC}_{50}$  was not calculated for 5 sites because (1) there was no change in abundance with  $\text{Cl}^-$ , (2) there was an increase in abundance with  $\text{Cl}^-$  or (3) zooplankton abundance did not remain below 50% along the  $\text{Cl}^-$  gradient.

## APPENDIX 5

### *Taxonomic keys and protocols for zooplankton identification:*

- Brooks, J. 1959. Cladocera. Pages 587–656 in H. Ward and G. Whipple, editors. Freshwater biology. John Wiley and Sons, New York, New York, USA.
- DeMelo, R., and P. D. N. Hebert. 1994. A taxonomic reevaluation of North American Bosminidae. . *Canadian Journal of Zoology-Revue Canadienne De Zoologie*:1808–1825.
- Dussart, B.H., Defaye, D., 1995. Introduction to the Copepoda. In: Guides to the Identification of the Microinvertebrates of the Continental Waters of the World (Dumont, H.J.F., Ed.), 7. SPB Academic Publishing, The Hague. 277 pp.
- Dussart, B.H., Defaye, D., 2001. Introduction to the Copepoda. In: Guides to the Identification of the Microinvertebrates of the Continental Waters of the World (Dumont, H.J.F., Ed.). 2nd ed., Backhuys, Leiden. 344 pp.
- Edmondson, W. 1960. Rotifera in Freshwater Biology. John Wiley and Sons, New York, New York, USA.
- Haney, J.F. et al. "An-Image-based Key to the Zooplankton of North America" version 5.0 released 2013. University of New Hampshire Center for Freshwater Biology
- Hebert, P. D. N. 1995. The Daphnia of North America: an illustrated fauna. CD-ROM. *University of Guelph, Guelph, Ontario, Canada.*
- Hudson, P., and L. Lesko. 2003. Free-living and Parasitic Copepods of the Laurentian Great Lakes: keys and details on individual species.  
<http://www.glsc.usgs.gov/greatlakescopepods/>
- Koste, W., 1978. Rotatoria. Die Rädertiere Mitteleuropas. Bd 1-2. Gebrüder Borntraeger, Berlin, Stuttgart.
- Nogrady, T., 1982. Rotifera. In: Synopsis and Classification of Living Organisms (Parker, S.P., Ed.), pp. 865-872. McGraw-Hill Book Co., New York, NY.
- Nogrady, T., Wallas, R.L., Snell, T.W., 1993. Biology, Ecology and Systematics. In: Rotifera (Nogrady, T., Ed.), Vol. 1, 142 pp. SPB Academic Publishing.
- Smith, K., and F. C. H. 1978. A guide to the freshwater calanoid and cyclopoid copepod Crustacea of Ontario. Ser. No. 18, University of Waterloo, Department of Biology, Waterloo, Ontario, Canada.
- Stemberger, R. 1979. A guide to rotifers of the Laurentian Great Lakes. Environmental Monitoring and Support Laboratory, Office of Research and Development, US Environmental Protection Agency, Washington, D.C., USA.
- Stemberger, R. S., and J. J. Gilbert. 1987. Rotifer threshold food concentrations and the size-efficiency hypothesis. *Ecology* **68**:181-187.
- Telesh, I.V., Heerkloss, R., 2002. Atlas of Estuarine Zooplankton of the Southern and Eastern Baltic Sea. Part I: Rotifera. Verlag Dr. Kovač, Hamburg. 89 pp.

**Table 5.1.** Mesocosm characteristics for site-specific set up and methods.

| Lake       | Mesocosm volume (L) | Number of mesocosms | Mesocosm type | Mesocosm cover    | Nutrients added*        |
|------------|---------------------|---------------------|---------------|-------------------|-------------------------|
| Paint      | 800                 | 30                  | Land-based    | Window screen     | 5% per day ambient N, P |
| Long       | 1570                | 30                  | In-lake       | Window screen     | 5% per day ambient N, P |
| Dartmouth  | 121                 | 21                  | Land-based    | Window screen     | Leaf bag added week 0   |
| Sturgeon   | 200                 | 30                  | Land-based    | Window screen     | No                      |
| Purdue     | 150                 | 30                  | Land-based    | Window screen     | 5% per day ambient N, P |
| Stortjärn  | 550                 | 20                  | In-lake       | None              | No                      |
| Croche     | 2500                | 20                  | In-lake       | Coarse mesh       | 5% per day ambient N, P |
| George     | 1000                | 30                  | Land-based    | Shade cloth (60%) | 5% per day ambient N, P |
| Opeongo    | 180                 | 30                  | Land-based    | Window screen     | 5% per day ambient N, P |
| Kraus      | 300                 | 32                  | Land-based    | Window screen     | 5% per day ambient N, P |
| Hertel     | 80                  | 20                  | Land-based    | Window screen     | 5% per day ambient N, P |
| KBS        | 345                 | 21                  | Land-based    | Window screen     | 5% per day ambient N, P |
| Feresjön   | 550                 | 20                  | In-lake       | None              | No                      |
| Erken      | 550                 | 20                  | In-lake       | None              | 5% per day ambient N, P |
| Convict    | 1000                | 30                  | Land-based    | Shade cloth (40%) | 5% per day ambient N, P |
| Tavernoles | 200                 | 20                  | Land-based    | Plastic cover     | 5% per day ambient N, P |

\*generally added every two weeks; weekly in George

**Table 5.2.** Zooplankton sampling and counting methods for the final day.

| Lake       | Sampling method  | Mesh size ( $\mu\text{m}$ ) | Volume sampled (L) | Counting protocol                                                 |
|------------|------------------|-----------------------------|--------------------|-------------------------------------------------------------------|
| Paint      | 12L *3 Schindler | 50                          | 36                 | 250 ind.with <50 ind/sp. or until 3 subsamples yielded no new sp. |
| Long       | 15cm dia. net    | 50                          | 177                | 250 ind.with <50 ind/sp. or until 3 subsamples yielded no new sp. |
| Dartmouth  | Integrated tube  | 53                          | 4                  | Entire sample                                                     |
| Sturgeon   | 15cm dia. net    | 50                          | 8.8                | Subsamples of 100 ind. repeated until CV<0.3                      |
| Purdue     | Grab sample*3    | 50                          | 14.4               | 12.5-100% of sample                                               |
| Stortjärn  | 2.5L*6 Ruttner   | 55                          | 10                 | 10-100% of sample                                                 |
| Croche     | 35cm dia. net    | 54                          | 106                | >200 ind./sp OR 1000 total ind. OR entire sample                  |
| George     | 0.5L*24 grab     | 50                          | 12                 | 25% of sample with scan for rare species                          |
| Opeongo    | 2L*5 tube        | 50                          | 10                 | >100 ind. or 5 subsamples                                         |
| Kraus      | Integrated tube  | 50                          | 12                 | 25-200% crustacean sample, 5% rotifer sample                      |
| Hertel     | Integrated tube  | 53                          | 8                  | Entire sample                                                     |
| KBS        | 10L grab         | 60                          | 30                 | Subsamples until 75 ind./sp. counted                              |
| Feresjon   | 2.5L*6 Ruttner   | 50                          | 10                 | Entire sample                                                     |
| Erken      | 2.5L*6 Ruttner   | 55                          | 10                 | >250 ind.                                                         |
| Convict    | Integrated tube  | 64                          | 20                 | 200 ind. with <50 per sp.                                         |
| Tavernoles | Multiple 5L grab | 50                          | 30                 | Subsamples until most abundant taxa = 100 ind.                    |

**Table 5.3.** Analytical methods. Fluor.=fluorometry, Spectro.=spectrophotometry

| Lake       | Conductivity probe                | Chloride                                     | Chlorophyll <i>a</i>  |
|------------|-----------------------------------|----------------------------------------------|-----------------------|
| Paint      | YSI 600XL                         | Dionex ICS1600<br>Ion chromatography         | Fluor./methanol       |
| Long       | YSI 600R                          | Dionex ICS1600<br>Ion chromatography         | Fluor./methanol       |
| Dartmouth  | YSI Pro DSS                       | Ion chromatography<br>EPA method 300         | Fluor./methanol       |
| Sturgeon   | YSI                               | Regression                                   | Fluor./methanol       |
| Purdue     | Oakton PCSTestr                   | Ion chromatography<br>EPA method 300         | Fluor./ethanol        |
| Stortjärn  | Metrohm IC detector               | IC Metrohm Net. V. 2.3<br>Ion Chromatography | LS 55 Fluor. Spectro. |
| Croche     | YSI pro plus                      | Dionex DX-600<br>Ion chromatography          | Spectro./ethanol      |
| George     | YSI pro plus                      | YSI pro plus                                 | Fluor./acetone        |
| Opeongo    | YSI                               | Dionex ICS1600<br>Ion chromatography         | Fluor./methanol       |
| Kraus      | YSI 6000                          | regression                                   | Fluor./methanol       |
| Hertel     | YSI pro plus                      | Dionex DX-600<br>Ion chromatography          | In vivo fluor.        |
| KBS        | Hydrolab HL4                      | regression                                   | Fluor./ethanol        |
| Feresjön   | Hach HQ40D with<br>CDC40103 probe | Metrohm IC system                            | LS 55 Fluor. Spectro. |
| Erken      | YSI Exosonde                      | Metrohm IC system                            | Spectro./ethanol      |
| Convict    | YSI pro plus                      | Dionex ICS-2000<br>Ion chromatography        | Fluor./acetone        |
| Tavernoles | YSI pro plus                      | Standard Methods 4500<br>Cl B*               | Spectro.              |

\*BOE num.163 Ordre de 1 de juliol de 1987. 15871

## APPENDIX 6

Tables and Figures for the principal components analysis (PCA) for water chemistry and zooplankton composition in control mesocosms.

**Table 6.1.** Analysis of variance results for cladoceran LC<sub>50</sub> as a function of chemistry PC1 and PC2. Model =  $\text{lm}(\text{LC}_{50}\text{Cladoceran} \sim \text{chem\_PC1} + \text{chem\_PC2})$ .

|           | Df | F value | Pr(>F) |
|-----------|----|---------|--------|
| chem_PC1  | 1  | 0.327   | 0.578  |
| chem_PC2  | 1  | 0.318   | 0.583  |
| Residuals | 12 |         |        |

**Table 6.2.** Analysis of variance results for cyclopoid copepod LC<sub>50</sub> as a function of chemistry PC1 and PC2. Model =  $\text{lm}(\text{LC}_{50}\text{cyclopoid} \sim \text{chem\_PC1} + \text{chem\_PC2})$ .

|           | Df | F value | Pr(>F) |
|-----------|----|---------|--------|
| chem_PC1  | 1  | 0.039   | 0.846  |
| chem_PC2  | 1  | 0.993   | 0.339  |
| Residuals | 12 |         |        |

**Table 6.3.** Analysis of variance results for calanoid LC<sub>50</sub> as a function of chemistry PC1 and PC2. Model =  $\text{lm}(\text{LC}_{50}\text{calanoid} \sim \text{chem\_PC1} + \text{chem\_PC2})$ .

|           | Df | F value | Pr(>F) |
|-----------|----|---------|--------|
| chem_PC1  | 1  | 0.351   | 0.570  |
| chem_PC2  | 1  | 2.757   | 0.135  |
| Residuals | 8  |         |        |



**Table 6.4.** Analysis of variance results for rotifer LC<sub>50</sub> as a function of chemistry PC1 and PC2. Model =  $\text{lm}(\text{LC}_{50\_rotifer} \sim \text{chem\_PC1} + \text{chem\_PC2})$ .

|           | <b>Df</b> | <b>F value</b> | <b>Pr(&gt;F)</b> |
|-----------|-----------|----------------|------------------|
| chem_PC1  | 1         | 14.169         | <b>0.007</b>     |
| chem_PC2  | 1         | 9.740          | <b>0.017</b>     |
| Residuals | 7         |                |                  |

**Table 6.5.** Analysis of variance results for cladoceran LC<sub>50</sub> as a function of cladoceran PC1 and PC2. Model =  $\text{lm}(\text{LC}_{50\_Cladoceran} \sim \text{clad\_PC1} + \text{clad\_PC2})$ .

|           | <b>Df</b> | <b>F value</b> | <b>Pr(&gt;F)</b> |
|-----------|-----------|----------------|------------------|
| clad_PC1  | 1         | 0.146          | 0.710            |
| clad_PC2  | 1         | 0.273          | 0.612            |
| Residuals | 12        |                |                  |

**Table 6.6.** Analysis of variance results for cyclopoid copepod LC<sub>50</sub> as a function of cyclopoid PC1 and PC2. Model =  $\text{lm}(\text{LC}_{50\_cyclopoid} \sim \text{cyc\_PC1} + \text{cyc\_PC2})$ .

|           | <b>Df</b> | <b>F value</b> | <b>Pr(&gt;F)</b> |
|-----------|-----------|----------------|------------------|
| cyc_PC1   | 1         | 1.076          | 0.320            |
| cyc_PC2   | 1         | 0.000          | 0.994            |
| Residuals | 11        |                |                  |

**Table 6.7.** Analysis of variance results for calanoid copepod LC<sub>50</sub> as a function of calanoid PC1 and PC2. Model=lm(LC<sub>50</sub>\_calanoid~ cal\_PC1+cal\_PC2). The lowest AIC was associated with the model that only included the intercept.

|           | <b>Df</b> | <b>F value</b> | <b>Pr(&gt;F)</b> |
|-----------|-----------|----------------|------------------|
| cal_PC1   | 1         | 0.182          | 0.681            |
| cal_PC2   | 1         | 0.777          | 0.404            |
| Residuals | 8         |                |                  |

**Table 6.8.** Analysis of variance results for rotifer LC<sub>50</sub> as a function of rotifer PC1 and PC2. Model=lm(LC<sub>50</sub>\_rotifer~ rot\_PC1+rot\_PC2).

|           | <b>Df</b> | <b>F value</b> | <b>Pr(&gt;F)</b> |
|-----------|-----------|----------------|------------------|
| rot_PC1   | 1         | 0.036          | 0.855            |
| rot_PC2   | 1         | 0.325          | 0.587            |
| Residuals | 7         |                |                  |

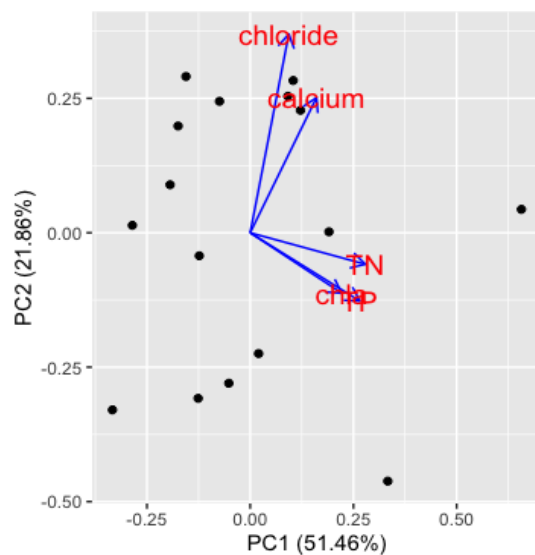

**Figure 6.1.** The first and second principal components for log<sub>10</sub>-transformed water chemistry variables (Cl<sup>-</sup>, Ca<sup>2+</sup>, TN, TP, chl a), representing source lake conditions at each of the 16 sites.

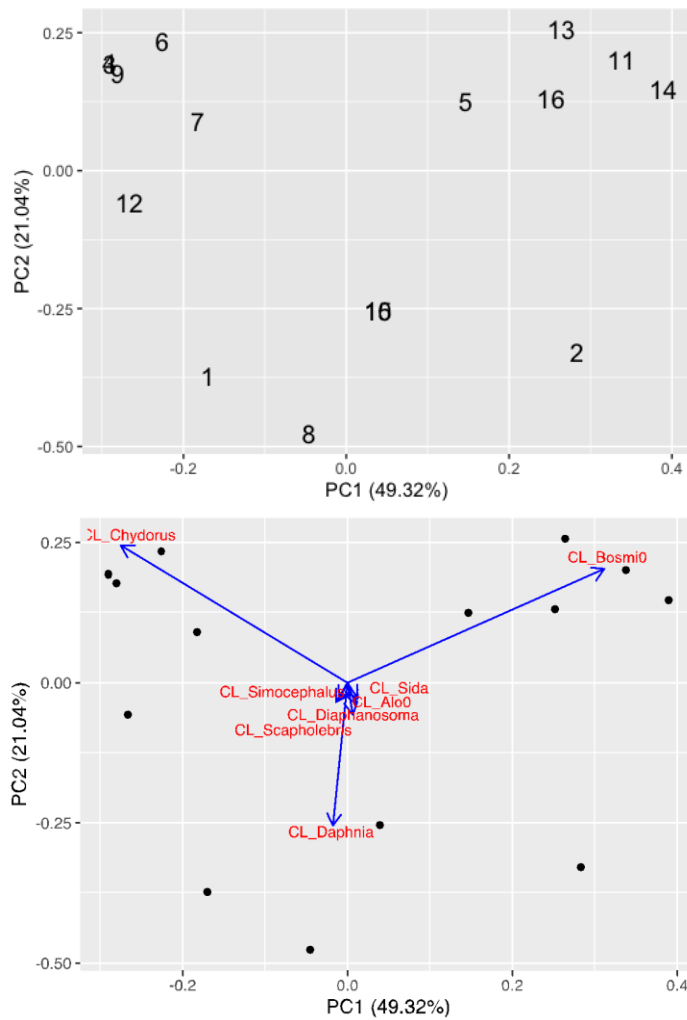

**Figure 6.2.** The first and second principal components for Hellinger-transformed cladoceran abundance in control mecosocms at each of the 16 sites. 1=Convict, 2=Croche, 3=Dartmouth, 4=Erken, 5=Feresjön, 6=George, 7 Hertel, 8=KBS, 9=Kraus, 10=Long, 11 = Opeongo, 12=Paint, 13=Purdue, 14=Stortjärn, 15= Sturgeon, 16=Tavernoles.

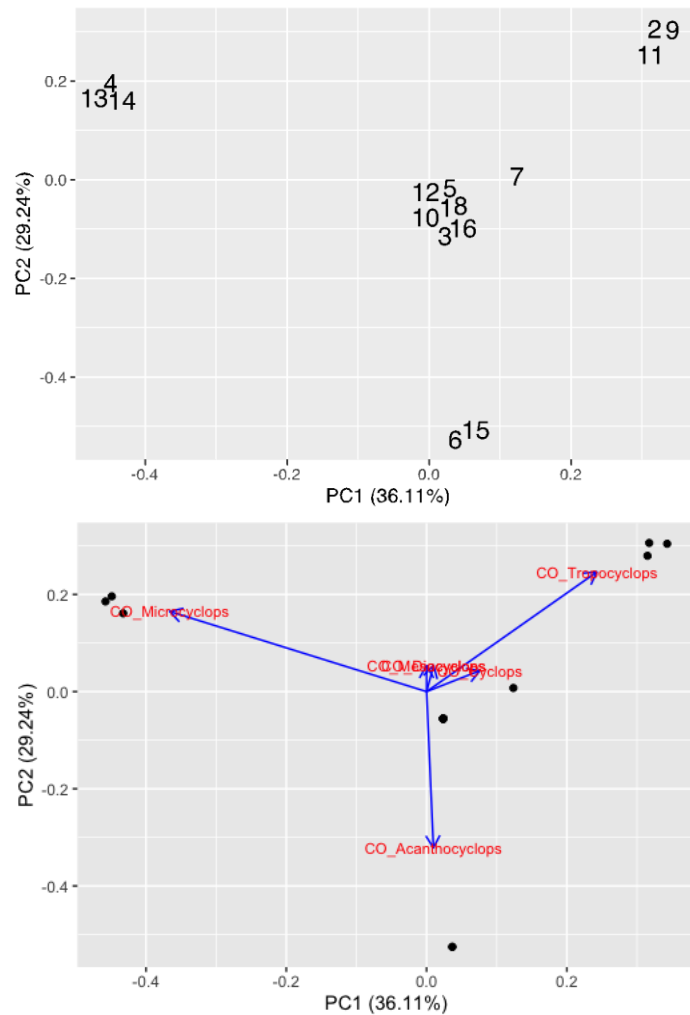

**Figure 6.3.** The first and second principal components for Hellinger-transformed cyclopoid copepod abundance in control meosocsms at each of the 16 sites. 1=Convict, 2=Croche, 3=Dartmouth, 4=Erken, 5=Feresjön, 6=George, 7 Hertel, 8=KBS, 9=Kraus, 10=Long, 11 = Opeongo, 12=Paint, 13=Purdue, 14=Stortjärn, 15= Sturgeon, 16=Tavernoles. Lake numbers have been jiddered for display.

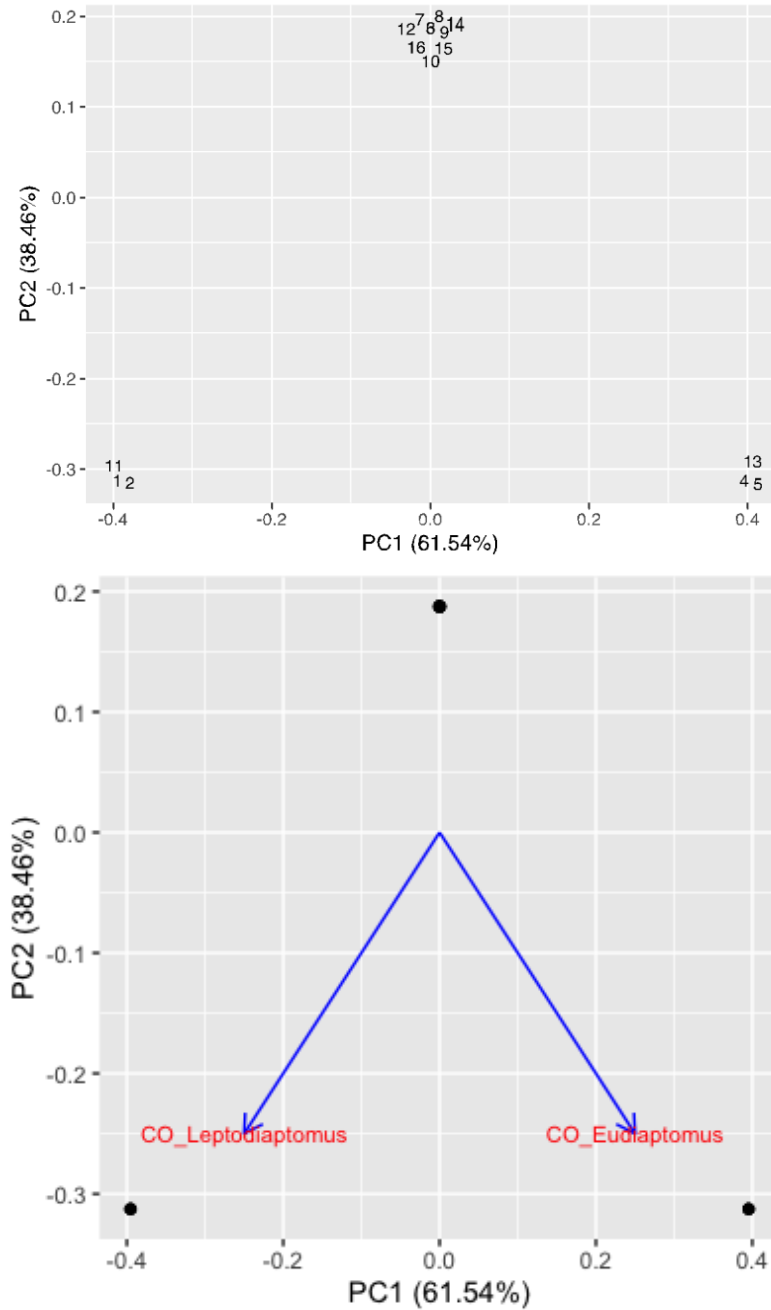

**Figure 6.4.** The first and second principal components for Hellinger-transformed calanoids abundance in control meosocms at each of the 16 sites. 1=Convict, 2=Croche, 3=Dartmouth, 4=Erken, 5=Feresjön, 6=George, 7 Hertel, 8=KBS, 9=Kraus, 10=Long, 11 = Opeongo, 12=Paint, 13=Purdue, 14=Stortjärn, 15= Sturgeon, 16=Tavernoles. Lake numbers have been jittered for display.

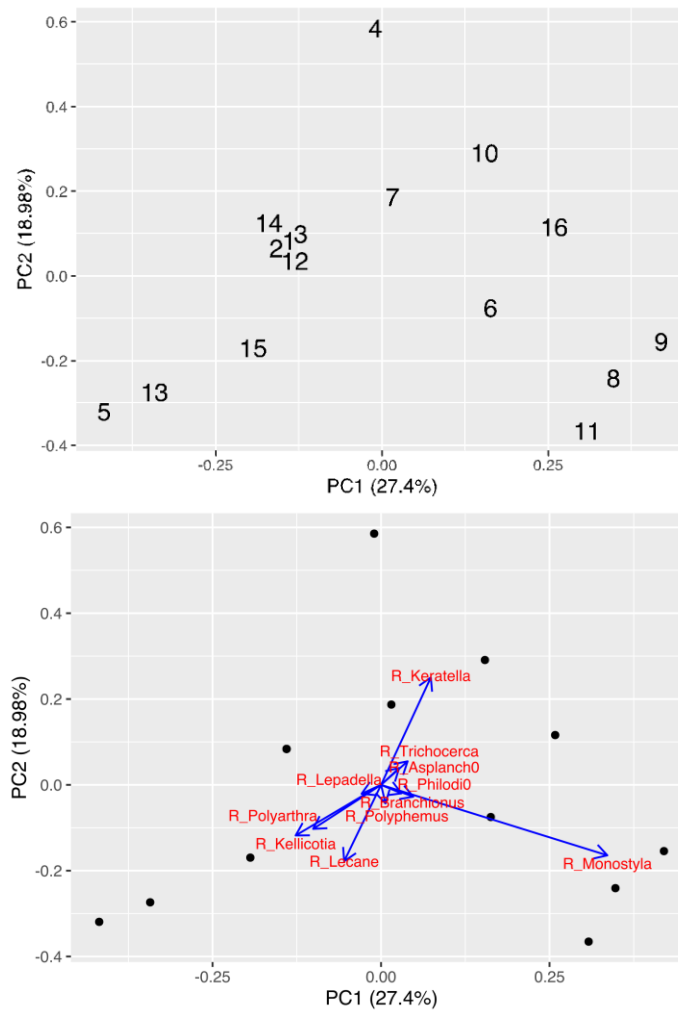

**Figure 6.5.** The first and second principal components for Hellinger-transformed rotifers abundance in control meosocsms at each of the 16 sites. 1=Convict, 2=Croche, 3=Dartmouth, 4=Erken, 5=Feresjön, 6=George, 7 Hertel, 8=KBS, 9=Kraus, 10=Long, 11 = Opeongo, 12=Paint, 13=Purdue, 14=Stortjärn, 15= Sturgeon, 16=Tavernoles.
